# Supplementary material for: Defining the in vivo characteristics of acute myeloid leukemia cells behavior by intravital imaging
Source: PubMed Central journal article supplement (PMC6446728; doi:10.1111/imcb.12216), 2018-12-13
Supplement: IMCB-97-229-s001.pdf [file IMCB-97-229-s001.pdf]

## **SUPPLEMENTARY ONLINE MATERIAL**

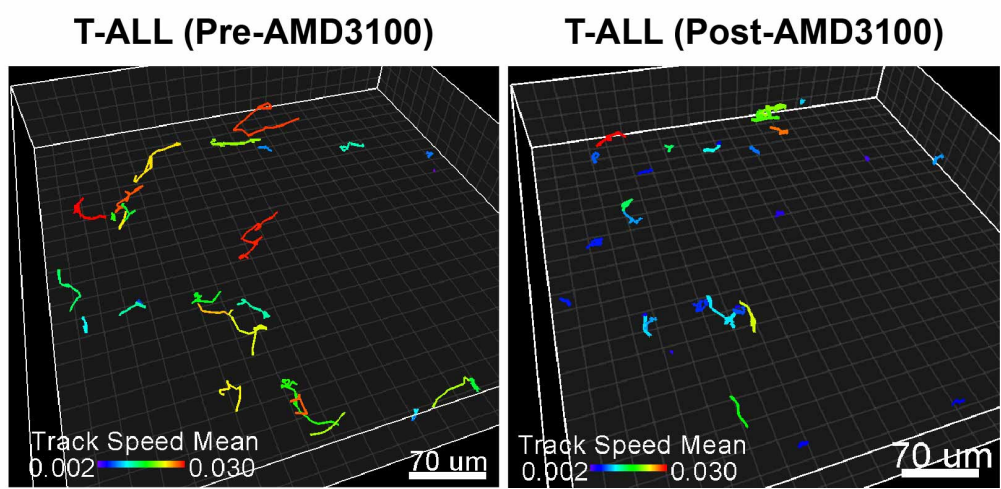

**Supplementary figure 1.** IVM timelapse analysis of leukemic cells. Representative tracks of seeding T-ALL cells before (1.5 hours) and after (3 hours) exposure to AMD3100.

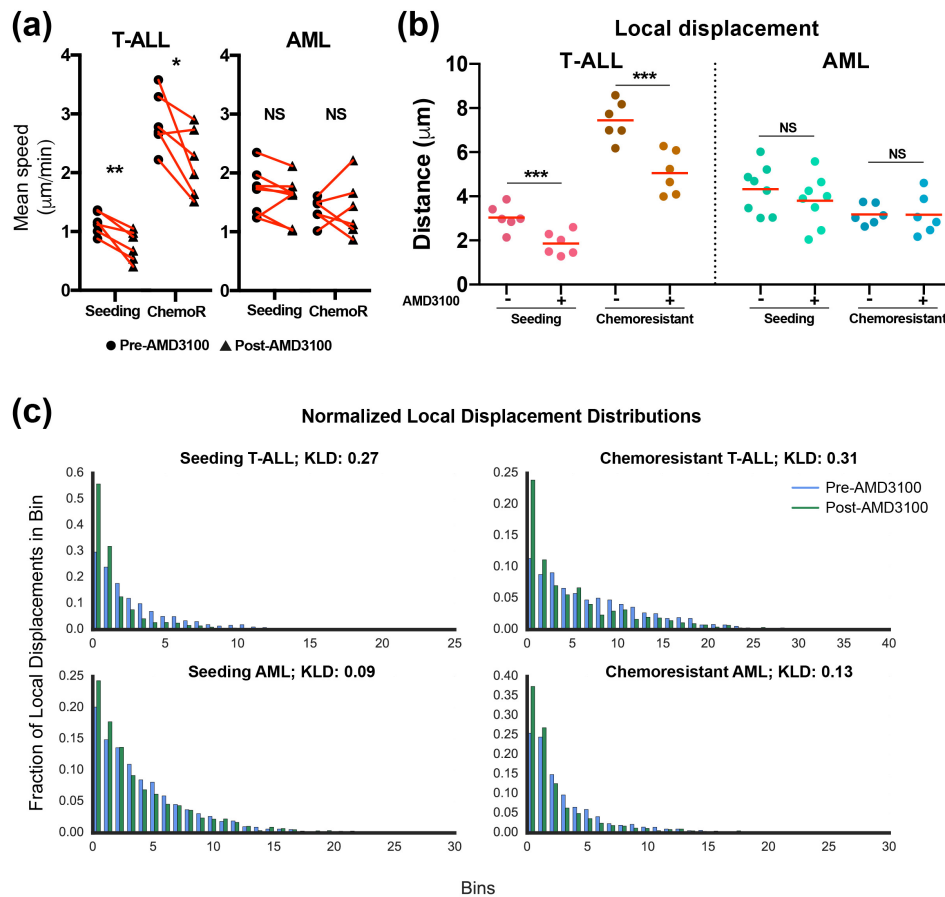

**Supplementary figure 2.** Local displacement of leukemic cells. **(a)** Paired analysis of mean speed of tracks in the same areas before and after AMD3100 injection. Data obtained as in Figure 3a and b; each dot represents a position. **(b)** AMD3100 significantly diminishes the local cell displacement of seeding and chemoresistant T-ALL cells, but not of AML cells. Shown is the averaged local displacement measured in each of the positions shown in panel A. **(c)** The normalised histograms show the displacement densities (distribution) for each of the conditions, Pre-AMD3100 (blue) and Post-AMD3100 (green). The most striking change in distribution profile is seen for T-ALL cells, where the distribution become less peaked around 0, leading to a reduced slope across bin heights. To quantify the differences between distributions we used Kullback-Liebler divergence (scale [0,1]). The KL divergences confirm the relatively large change in slope in the chemoresistant T-ALL condition, while in other cases the differences are smaller (and marginal for AML cells).

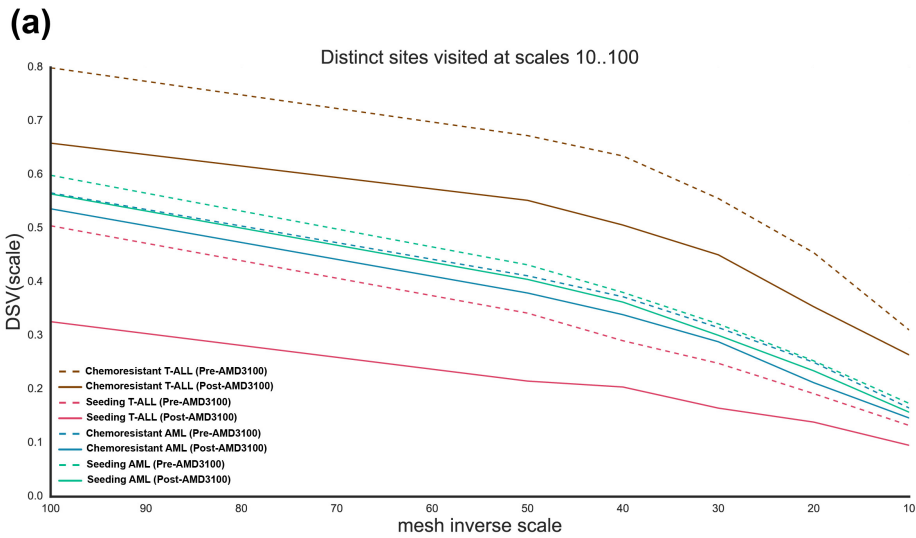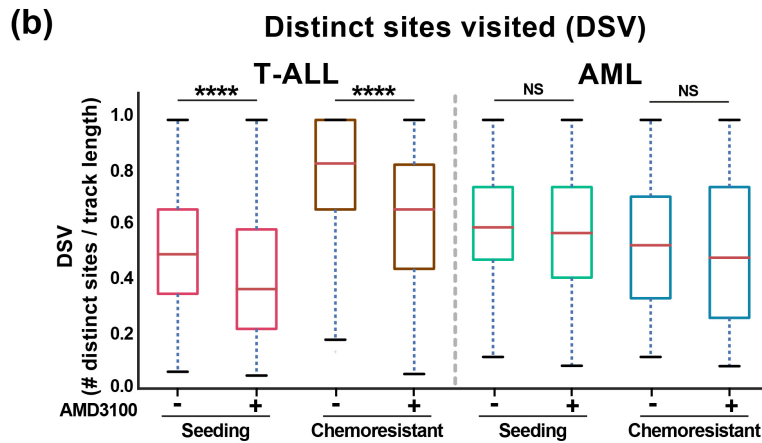

**Supplementary figure 3.** Distinct sites visited across different scales. To determine how leukemic cells explored the surrounding BM space, a “distinct sites visited” metric was derived by partitioning the volume of each BM position using a range of scales, from coarse to fine-grained, and quantifying how many partitions were visited over time. **(a)** “Scaling behaviour” of distinct sites visited (dsv) resulting from applying the dsv metric across multiple scales. On the x-axis from left (coarse-grained) to right (fine-grained), we plotted dsv (between 0 and 1 on the y-axis, with 0 indicating no new sites apart from initial ones are visited, and 1 all available sites visited over time). The plot shows not only the relative differences between conditions but also the scaling, as we consider track exploration at increasingly fine resolution. For example, the most exploratory condition is the chemoresistant T-ALL (Pre-AMD3100, highest y values). After AMD3100 injection, only seeding and chemoresistant T-ALL cells visited a lower number of sites. **(b)** Treatment-naïve and chemoresistant T-ALL, but not AML, become less exploratory after AMD3100 exposure, as assessed by the number of distinct sites visited. Red lines are median measurements, boxes include the 50% of measurements around the median and whiskers cover the remaining measurements. Shown are the results for mesh size of 100 shown in (a).

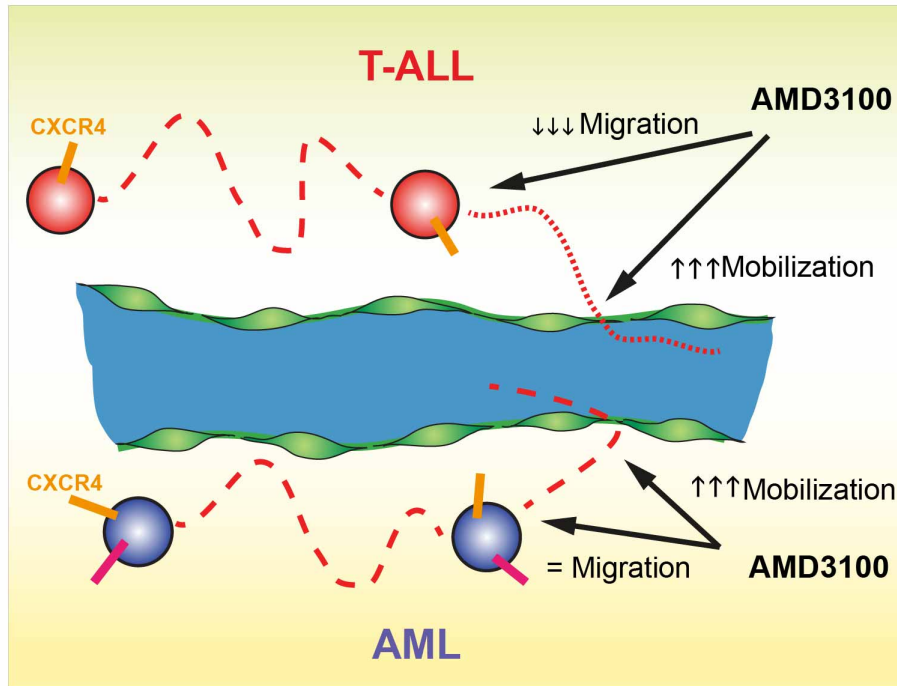

**Supplementary figure 4.** Proposed model for the effect of CXCR4 inhibition on AML and T-ALL cells. Both T-ALL and AML cells express high levels of CXCR4 at the cell surface level. CXCR4 antagonism can be achieved through the use of the clinically available small molecule AMD3100 or plerixafor. Using IVM, we show that administration of AMD3100 promotes the *in vivo* ousting of both propagating and chemoresistant AML and T-ALL cells from the BM. This is consistent with the knowledge that CXCL12 is a key BM retention and homing signal. In contrast, the motility of leukemia cells from different lineages is differentially impacted by CXCR4 antagonism. While AMD3100 significantly decreases the migration of both propagating and chemoresistant T-ALL cells, it does not affect the movement of AML cells.

**Supplementary table 1** – List of enriched genes in the GSEA analysis “*Chemokine mediated signaling pathway*” shown in Figure 3d.

| <b>GO CHEMOKINE MEDIATED SIGNALING PATHWAY</b> |                          |                          |                   |                        |
|------------------------------------------------|--------------------------|--------------------------|-------------------|------------------------|
| <b>PROBE</b>                                   | <b>RANK IN GENE LIST</b> | <b>RANK METRIC SCORE</b> | <b>RUNNING ES</b> | <b>CORE ENRICHMENT</b> |
| CCL3                                           | 203                      | 5,133283615              | 0,08070138        | Yes                    |
| CCL18                                          | 204                      | 5,133283615              | 0,18438217        | Yes                    |
| CCL3L3                                         | 205                      | 5,133283615              | 0,28806296        | Yes                    |
| CCR1                                           | 210                      | 5,105508804              | 0,39072993        | Yes                    |
| CCR2                                           | 441                      | 3,310226679              | 0,4315533         | Yes                    |
| CXCL3                                          | 518                      | 3,064232588              | 0,48484078        | Yes                    |
| CXCL1                                          | 519                      | 3,064232588              | 0,5467314         | Yes                    |
| CXCL2                                          | 520                      | 3,064232588              | 0,608622          | Yes                    |
| CX3CR1                                         | 556                      | 2,876471758              | 0,6627583         | Yes                    |
| CCL2                                           | 738                      | 2,196804285              | 0,6866398         | Yes                    |
| CCL15                                          | 1551                     | 1,023646235              | 0,6153975         | No                     |
| CCL23                                          | 1552                     | 1,023646235              | 0,6360729         | No                     |
| CCL4                                           | 2167                     | 0,641706705              | 0,5795297         | No                     |
| CXCR4                                          | 2833                     | 0,34236744               | 0,51116747        | No                     |
| CIB1                                           | 3789                     | -0,020158617             | 0,40346956        | No                     |
| PTK2B                                          | 3880                     | -0,048857506             | 0,39426845        | No                     |
| CCR7                                           | 8773                     | -8,328522682             | 0,008716332       | No                     |

**Supplementary table 2** – List of enriched genes in the GSEA analysis “*Regulation of chemotaxis*” shown in Figure 3d.

| <b>GO REGULATION OF CHEMOTAXIS</b> |                          |                          |                   |                        |
|------------------------------------|--------------------------|--------------------------|-------------------|------------------------|
| <b>PROBE</b>                       | <b>RANK IN GENE LIST</b> | <b>RANK METRIC SCORE</b> | <b>RUNNING ES</b> | <b>CORE ENRICHMENT</b> |
| F7                                 | 0                        | 10,15548992              | 0,07350727        | Yes                    |
| LBP                                | 87                       | 6,542850971              | 0,11107731        | Yes                    |
| ELANE                              | 105                      | 6,242546558              | 0,1543271         | Yes                    |
| CCL3                               | 203                      | 5,133283615              | 0,18044244        | Yes                    |
| CCR1                               | 210                      | 5,105508804              | 0,21671413        | Yes                    |
| IL6R                               | 314                      | 4,255020618              | 0,23578954        | Yes                    |
| MET                                | 373                      | 3,76494956               | 0,2564395         | Yes                    |
| TIAM1                              | 376                      | 3,715384007              | 0,2831045         | Yes                    |
| STX3                               | 383                      | 3,67607832               | 0,30902973        | Yes                    |
| PADI2                              | 405                      | 3,520959139              | 0,3321249         | Yes                    |
| CCR2                               | 441                      | 3,310226679              | 0,3521013         | Yes                    |
| CXCL3                              | 518                      | 3,064232588              | 0,36563066        | Yes                    |
| CXCL1                              | 519                      | 3,064232588              | 0,3878101         | Yes                    |
| CXCL2                              | 520                      | 3,064232588              | 0,4099896         | Yes                    |
| FN1                                | 547                      | 2,937853098              | 0,42829505        | Yes                    |
| SEMA4A                             | 549                      | 2,911321402              | 0,4492539         | Yes                    |
| PLXND1                             | 727                      | 2,235071898              | 0,44528607        | Yes                    |
| CCL2                               | 738                      | 2,196804285              | 0,46004876        | Yes                    |
| LYN                                | 790                      | 2,079992771              | 0,46929944        | Yes                    |
| RAC2                               | 927                      | 1,760790586              | 0,46656516        | Yes                    |
| AIF1                               | 1000                     | 1,647079468              | 0,47029218        | Yes                    |
| TGFB1                              | 1189                     | 1,365283847              | 0,45877668        | No                     |
| PPM1F                              | 1310                     | 1,235434055              | 0,45406088        | No                     |
| LGALS9                             | 1561                     | 1,019455552              | 0,4329855         | No                     |
| CORO1B                             | 1645                     | 0,954033256              | 0,43044415        | No                     |
| TIRAP                              | 1984                     | 0,748717427              | 0,3973932         | No                     |
| CCL4                               | 2167                     | 0,641706705              | 0,38132322        | No                     |
| IL16                               | 2348                     | 0,560674846              | 0,36489433        | No                     |
| GPSM3                              | 2700                     | 0,394473344              | 0,32779968        | No                     |
| ADAM17                             | 2713                     | 0,387390345              | 0,32923788        | No                     |
| VEGFA                              | 2749                     | 0,3726601                | 0,32795164        | No                     |
| ADAM10                             | 2824                     | 0,34682399               | 0,32203954        | No                     |
| CXCR4                              | 2833                     | 0,34236744               | 0,32360712        | No                     |
| NCKAP1L                            | 2916                     | 0,308796704              | 0,31650922        | No                     |
| CALR                               | 2954                     | 0,298236251              | 0,31445664        | No                     |
| MPP1                               | 3000                     | 0,277209342              | 0,31134138        | No                     |
| USP14                              | 3529                     | 0,081111714              | 0,25183287        | No                     |

|        |      |              |              |    |
|--------|------|--------------|--------------|----|
| PDGFRB | 3602 | 0,053391952  | 0,24402447   | No |
| PTK2B  | 3880 | -0,048857506 | 0,21285067   | No |
| VEGFB  | 4005 | -0,094021827 | 0,19941786   | No |
| CREB3  | 4050 | -0,106298432 | 0,1951793    | No |
| CAMK1D | 4237 | -0,166252315 | 0,17521262   | No |
| AKT2   | 4274 | -0,176383391 | 0,17239189   | No |
| SEMA4D | 4449 | -0,238386244 | 0,15431313   | No |
| PLXNC1 | 4904 | -0,391598046 | 0,10547448   | No |
| STX4   | 5561 | -0,616984308 | 0,03527609   | No |
| SEMA4C | 5648 | -0,653857231 | 0,030220525  | No |
| C1QBP  | 5675 | -0,662047982 | 0,032053296  | No |
| RAC1   | 5698 | -0,668380797 | 0,03438717   | No |
| PTPRO  | 6171 | -0,871232033 | -0,013028522 | No |
| ANO6   | 6199 | -0,887188435 | -0,009679963 | No |
| IL1B   | 6415 | -0,977894843 | -0,027072532 | No |
| HMGB1  | 6755 | -1,122810721 | -0,057529535 | No |
| BMPR2  | 7053 | -1,274315715 | -0,082109585 | No |
| SEMA4B | 7146 | -1,333665133 | -0,08292748  | No |
| PTPN2  | 7205 | -1,369705796 | -0,079614714 | No |
| PRKD2  | 7695 | -1,791781187 | -0,122302204 | No |
| STAP1  | 7898 | -2,014371157 | -0,13071294  | No |
| SWAP70 | 8015 | -2,202749252 | -0,12797187  | No |
| SMAD3  | 8322 | -3,107149363 | -0,1403099   | No |
| NRP1   | 8411 | -3,582346439 | -0,12439616  | No |
| CD74   | 8484 | -4,242264748 | -0,10188474  | No |
| NOTCH1 | 8493 | -4,333322048 | -0,07142991  | No |
| SEMA7A | 8691 | -7,12221384  | -0,042300068 | No |
| CCR7   | 8773 | -8,328522682 | 0,00876407   | No |



**Supplementary table 3** – List of enriched genes in the GSEA analysis “Leukocyte chemotaxis” shown in Figure 3d.

| <b>GO LEUKOCYTE CHEMOTAXIS</b> |                          |                          |                   |                        |
|--------------------------------|--------------------------|--------------------------|-------------------|------------------------|
| <b>PROBE</b>                   | <b>RANK IN GENE LIST</b> | <b>RANK METRIC SCORE</b> | <b>RUNNING ES</b> | <b>CORE ENRICHMENT</b> |
| LBP                            | 87                       | 6,542850971              | 0,049069043       | Yes                    |
| ITGA1                          | 89                       | 6,481617928              | 0,10736016        | Yes                    |
| FCER1G                         | 201                      | 5,146949768              | 0,1411234         | Yes                    |
| CCL3                           | 203                      | 5,133283615              | 0,1872649         | Yes                    |
| CCL18                          | 204                      | 5,133283615              | 0,23352006        | Yes                    |
| CCL3L3                         | 205                      | 5,133283615              | 0,2797752         | Yes                    |
| CCR1                           | 210                      | 5,105508804              | 0,3253255         | Yes                    |
| TREM1                          | 299                      | 4,395771503              | 0,35493392        | Yes                    |
| IL6R                           | 314                      | 4,255020618              | 0,39168411        | Yes                    |
| ANXA1                          | 399                      | 3,54687953               | 0,4140979         | Yes                    |
| CCR2                           | 441                      | 3,310226679              | 0,43926618        | Yes                    |
| CXCL3                          | 518                      | 3,064232588              | 0,45824012        | Yes                    |
| VAV3                           | 531                      | 3,025216341              | 0,48413604        | Yes                    |
| CX3CR1                         | 556                      | 2,876471758              | 0,50732785        | Yes                    |
| CCL2                           | 738                      | 2,196804285              | 0,5065524         | Yes                    |
| KIT                            | 855                      | 1,939997077              | 0,5108501         | Yes                    |
| SYK                            | 869                      | 1,902852297              | 0,5265189         | Yes                    |
| CORO1A                         | 905                      | 1,800390959              | 0,5387642         | Yes                    |
| VAV1                           | 1111                     | 1,462034464              | 0,5286402         | Yes                    |
| LGALS3                         | 1269                     | 1,27756238               | 0,5223092         | Yes                    |
| ITGB2                          | 1327                     | 1,220535874              | 0,52682924        | Yes                    |
| FFAR2                          | 1368                     | 1,181957483              | 0,53293365        | Yes                    |
| CCL15                          | 1551                     | 1,023646235              | 0,5214734         | Yes                    |
| CCL23                          | 1552                     | 1,023646235              | 0,5306973         | Yes                    |
| CKLF                           | 1644                     | 0,95429045               | 0,52895415        | Yes                    |
| IL17RA                         | 1661                     | 0,946500361              | 0,53566456        | Yes                    |
| PIK3CG                         | 1674                     | 0,938457251              | 0,54275703        | Yes                    |
| LYST                           | 1729                     | 0,898932397              | 0,5447201         | Yes                    |
| CCL4                           | 2167                     | 0,641706705              | 0,5008377         | No                     |
| ADAM8                          | 2191                     | 0,63034004               | 0,5039036         | No                     |
| IL16                           | 2348                     | 0,560674846              | 0,4912265         | No                     |
| PIK3CD                         | 2682                     | 0,407723129              | 0,4570552         | No                     |
| VEGFA                          | 2749                     | 0,3726601                | 0,45291233        | No                     |
| CXCR4                          | 2833                     | 0,34236744               | 0,44656447        | No                     |
| NCKAP1L                        | 2916                     | 0,308796704              | 0,44002774        | No                     |
| PIP5K1C                        | 3051                     | 0,25248608               | 0,42707384        | No                     |
| NUP85                          | 3234                     | 0,186751097              | 0,40807244        | No                     |

|        |      |              |              |    |
|--------|------|--------------|--------------|----|
| GBF1   | 3277 | 0,167535529  | 0,40480882   | No |
| RPS19  | 3506 | 0,08792831   | 0,3796891    | No |
| PREX1  | 5548 | -0,611841202 | 0,15324411   | No |
| RAC1   | 5698 | -0,668380797 | 0,14233303   | No |
| S100A8 | 5833 | -0,727110147 | 0,13365589   | No |
| PTPRO  | 6171 | -0,871232033 | 0,10320661   | No |
| ANO6   | 6199 | -0,887188435 | 0,108132385  | No |
| S100A9 | 6301 | -0,931081355 | 0,10504363   | No |
| PDE4B  | 6352 | -0,953925967 | 0,10795683   | No |
| IL1B   | 6415 | -0,977894843 | 0,10972222   | No |
| PDE4D  | 6625 | -1,056008816 | 0,09548504   | No |
| HMGB1  | 6755 | -1,122810721 | 0,090941735  | No |
| SBDS   | 7046 | -1,271273255 | 0,06943867   | No |
| ITGA9  | 8662 | -6,693085194 | -0,053794645 | No |
| CCR7   | 8773 | -8,328522682 | 0,008750852  | No |

**Supplementary table 4** – List of enriched genes in the GSEA analysis “*Reactome peptide ligand binding receptors*” shown in Figure 3d.

| <b>REACTOME PEPTIDE LIGAND BINDING RECEPTORS</b> |                          |                          |                   |                        |
|--------------------------------------------------|--------------------------|--------------------------|-------------------|------------------------|
| <b>PROBE</b>                                     | <b>RANK IN GENE LIST</b> | <b>RANK METRIC SCORE</b> | <b>RUNNING ES</b> | <b>CORE ENRICHMENT</b> |
| PENK                                             | 13                       | 8,547304153              | 0,13221817        | Yes                    |
| CCL3                                             | 203                      | 5,133283615              | 0,19111407        | Yes                    |
| CCL3L3                                           | 205                      | 5,133283615              | 0,27129138        | Yes                    |
| CCR1                                             | 210                      | 5,105508804              | 0,3506947         | Yes                    |
| C3                                               | 352                      | 3,934672117              | 0,39627644        | Yes                    |
| APP                                              | 369                      | 3,77812171               | 0,45355946        | Yes                    |
| ANXA1                                            | 399                      | 3,54687953               | 0,505754          | Yes                    |
| CCR2                                             | 441                      | 3,310226679              | 0,55288863        | Yes                    |
| CXCL3                                            | 518                      | 3,064232588              | 0,5922137         | Yes                    |
| CXCL1                                            | 519                      | 3,064232588              | 0,64014184        | Yes                    |
| CXCL2                                            | 520                      | 3,064232588              | 0,68807           | Yes                    |
| CX3CR1                                           | 556                      | 2,876471758              | 0,7290994         | Yes                    |
| CCL2                                             | 738                      | 2,196804285              | 0,74297094        | Yes                    |
| CCL4                                             | 2167                     | 0,641706705              | 0,5913598         | No                     |
| CXCR4                                            | 2833                     | 0,34236744               | 0,52143747        | No                     |
| HEBP1                                            | 7771                     | -1,866028905             | -0,008239181      | No                     |
| CCR7                                             | 8773                     | -8,328522682             | 0,008716368       | No                     |

## SUPPLEMENTARY VIDEO LEGENDS

**Supplementary video 1. *In situ* migration of parenchymal AML cells and the effect of AMD3100.** Representative maximum projection of 3D time-lapse data (shown at 10 frames per second) of areas from Flk1-GFP mice acquired every 3min for 90 min prior and 180 min post-AMD3100 administration. Single cells at seeding (first part) and chemoresistant (second part) stages were tracked. Red: AML cells; green: Flk1-GFP<sup>+</sup> endothelial cells; blue: Cy5- labelled dextran inside blood vessels. The first frame of the blue channel was copied across the full movie to correct for Cy5 signal bleaching. Upon CXCR4 inhibition, parenchymal cells maintain the same migratory behavior as prior to AMD3100 administration.

**Supplementary video 2. *In situ* migration of parenchymal T-ALL cells and the effect of AMD3100.** Representative maximum projection of 3D time-lapse data (shown at 10 frames per second) of areas from Flk1-GFP mice acquired every 3min for 90 min prior and 180 min post-AMD3100 administration. Single cells at seeding (first part) and chemoresistant (second part) stages were tracked. Red: T-ALL cells; green: Flk1-GFP<sup>+</sup> endothelial cells; blue: Cy5-labelled dextran inside blood vessels. The first frame of the blue channel was copied across the full movie to correct for cy5 signal bleaching. Upon CXCR4 inhibition, parenchymal T-ALL cells are significantly less migratory.

**Supplementary video 3. AMD3100 promotes intravasation of AML cells.** Representative maximum projection of 3D time-lapse data (shown at 10 frames per second) of areas from Flk1-GFP mice acquired every 3min for 90 min prior and 180 min post-AMD3100 administration. Single cells at seeding (first part) and chemoresistant (second part) stages were tracked. Red: AML cells; green: Flk1-GFP<sup>+</sup> endothelial cells; blue: Cy5- labelled dextran inside blood vessels. The first frame of the blue channel was copied across the full movie to correct for cy5 signal bleaching. Upon CXCR4 inhibition, mobilized AML cells are visible inside vessels. Parenchymal cells maintain the same migratory behavior as prior to AMD3100 administration.

**Supplementary video 4. Seeding and chemoresistant T-ALL cell mobilization.** Representative maximum projection of 3D time-lapse data (shown at 10 frames per second) of areas from Flk1-GFP mice acquired every 3min for 90 min prior and 180 min post-AMD3100 administration. Single cells at seeding (first part) and chemoresistant (second part) stages were tracked. Red: T-ALL cells; green: Flk1-GFP<sup>+</sup> endothelial cells; blue: Cy5-labelled dextran inside blood vessels. The first frame of the blue channel was copied across the full movie to correct for cy5 signal bleaching. Upon CXCR4 inhibition, mobilized T-ALL cells are visible inside vessels.

**Supplementary video 5. AMD3100 induces little AML cell death and minimal impact on cell clusters.** Representative maximum projection of 3D time-lapse data (shown at 10 frames per second) of areas from Flk1-GFP mice acquired every 3min for 90 min prior and 180 min post-AMD3100 administration. Cell clusters at seeding (first part) and chemoresistant (second part) stages are marginally affected by AMD3100. Red: AML cells; green: Flk1-GFP<sup>+</sup> endothelial cells; blue: Cy5-labelled dextran inside blood vessels. The first frame of the blue channel was copied across the full movie to correct for cy5 signal bleaching. Arrows point at intravasating cells.

**Supplementary video 6. AMD3100 induces T-ALL cell death, contributing to dramatic reduction in cell cluster sizes.** Representative maximum projection of 3D time-lapse data (shown at 10 frames per second) of areas from Flk1-GFP mice acquired every 3min for 90 min prior and 180 min post-AMD3100 administration. Single cells at seeding (first part) and chemoresistant (second part) stages were tracked. Red: T-ALL cells; green: Flk1-GFP<sup>+</sup> endothelial cells; blue: Cy5-labelled dextran inside blood vessels. The first frame of the blue channel was copied across the full movie to correct for cy5 signal bleaching. Clusters of early colonizing (first part) and chemoresistant (second part) T-ALL cells are significantly reduced upon injection of AMD3100. Arrows point at intravasating cells. Cell death caused by AMD3100 is frequent and evidenced by reduction of the cell size and disappearance of fluorescent red signal over time (arrowheads and circles).

## **METHODS**

### **Mice**

All animal work was in accordance with the animal ethics committee at Imperial College London, UK and UK Home Office regulations (ASPA 1986). Flk1-GFP mice were a gift from Alexander Medvinsky (University of Edinburgh)<sup>1</sup>, PU1-YFP were a gift from Claus Nerlov (University of Oxford)<sup>2</sup>. C57Bl/6 mice were from Harlan UK Ltd.

### **T-ALL experimental model**

As described in<sup>3, 4</sup>. Briefly, secondary 10,000-50,000 thawed, Ficoll purified Notch DsRed<sup>+</sup> T-ALL blasts were injected into sub-lethally irradiated tertiary recipients. Early colonization of the BM was detected between day 8 to day 12 post-transplantation. Full infiltration of the BM was observed between day 18 and day 20 post-transplantation and confirmed by sampling of peripheral blood.

### **AML experimental model**

As described in<sup>5</sup>. Briefly, mTomato<sup>+</sup> or PU.1-YFP<sup>+</sup> granulocyte monocyte progenitors (GMPs) were sorted from mT/mG or PU.1-YFP mice, transduced with pMSCV-MLL-AF9-GFP-based retroviruses as described in<sup>3</sup> and transplanted into sub-lethally irradiated mice. After 8 weeks post-transplantation, recipient mice developed leukemia and BM and spleen blasts were harvested and stored. 100,000 primary mTomato<sup>+</sup> or PU.1-YFP<sup>+</sup> blasts were injected into non-conditioned recipients. Early colonization of the BM was detected between day 10 to day 14 post-transplantation. Full infiltration of the BM was observed between day 20 and day 22 post-transplantation and confirmed by sampling of peripheral blood.

### **Therapies administration**

To model chemoresistance, drugs commonly administered in the treatment regimens of T-ALL and AML patients were used in our mouse models.

Mice burdened with T-ALL were treated daily, for 3 days, with i.v. 15 mg kg<sup>-1</sup> dexamethasone sodium phosphate (Sellekchem, MA), 0.15 mg kg<sup>-1</sup> vincristine (Sigma) and 1,000 IU kg<sup>-1</sup> l-asparaginase (medac; obtained from the Imperial College Healthcare NHS Trust Pharmacy)<sup>4</sup>.

Mice burdened with AML were treated daily i.v. with 100mg kg<sup>-1</sup> cytarabine (Ara-C) I.V. for 5 days and 3mg kg<sup>-1</sup> doxorubicin (Doxo) for 3 days. Ara-C was co-delivered with Doxo on days 1 to 3 and alone on days 4 and 5, similarly to induction chemotherapy used in AML patients<sup>6</sup>. Both Ara-C and Doxo were obtained from the Imperial College Healthcare NHS Trust Pharmacy.

For CXCR4 inhibition experiments, mice were i.v. injected with 4mg kg<sup>-1</sup> AMD3100 octahydrochloride hydrate (Sigma-Aldrich).

### **Flow cytometry**

To obtain a single cell suspension of bone marrow cells, bones were crushed, centrifuged at 500g for 5min, resuspended in PBS with 2% fetal bovine serum, filtered through a 40µm strainer and stained. The following fluorochrome-conjugated or biotinylated primary antibodies specific to mouse were used: CD3e (145-2C11), CD4 (GK1.5), CD8a (53-6.7), Ter119 (TER119), B220 (RA3-6B2), Ly6G (RB-68C5), CD11b (M1/70) all from Biolegend and CXCR4 (2B11) from eBiosciences. Streptavidin Pacific Orange (Invitrogen) was used for secondary staining. Dead cells

were excluded using 4,6-diamidino-2-phenylindole (DAPI, Invitrogen). Samples were acquired in a LSR Fortessa and analysed with FlowJo (Tree Star).

### **Intravital microscopy**

As described in <sup>4</sup>. Briefly, we used a Zeiss LSM 780 upright confocal microscope fitted with Argon 488nm, HeNe 561 and 633nm lasers and a tunable infrared multiphoton laser (Spectraphysics Mai Tai DeepSee 690-1040). A W Plan-Apochromat ×20 DIC water immersion lens (1.0 N.A) was used. Second harmonic generation (SHG) signal was used to detect bone collagen. SHG signal (not shown for simplicity) was acquired through excitation at 870nm and detection with an external non-descanned detector (NDD) (<495nm). GFP and YFP signals were excited at 488nm, mTomato at 561nm and Cy5 at 633nm; GFP, YFP, mTomato and YFP signals were detected using internal detectors. Blood vessels were labeled with 80µl of 8mg ml<sup>-1</sup> 500kD Cy5-Dextran (Nanocs, MA).

### **RNA sequencing and analysis**

RNA-seq was performed as described previously <sup>7</sup>. Total RNA was extracted using RNeasy<sup>®</sup> Mini Kit (Qiagen, Hilden, Germany). The extracted RNA was analysed on the Agilent 4200 TapeStation prior to library preparation. High quality RNA with RIN values greater than 9 was used for downstream application. 3'mRNA-sequencing libraries were prepared from 100ng of total RNA using the QuantSeq 3' mRNA-Seq Library Prep Kit (Lexogen) according to the manufacturers instructions and sequenced on a NextSeq 500 (Illumina). The single-end 75bp were demultiplexed using CASAVA v1.8.2 and Cutadapt (v1.9) was used for read trimming. The trimmed reads were subsequently mapped to the mouse genome (mm10) using HISAT2. FeatureCounts was used for read counting <sup>8</sup> after which differential gene expression analysis was performed using Voom-LIMMA packages <sup>9</sup>. Data for RNA-seq for AML and T-ALL samples can be accessed through Gene Expression Omnibus (GEO) with the accession numbers GSE105159 and GSE102757 respectively. GSEA2-2.2.2 was used for Gene set enrichment analysis (GSEA) <sup>10, 11</sup>.

### **Image analysis**

Imaging data was exported as .lsm files and pre-processed in Fiji/ImageJ. To correct for 3D drift over time, movies of the same area acquired separately were concatenated and registered<sup>26</sup> using the stromal signal (e.g. Flk1-GFP<sup>+</sup>) as the reference channel. Imaris (Bitplane, Switzerland) was used to detect the leukemia cells and create either “spots” or “surfaces”; semi-automatic cell tracking was done using built-in algorithms that were manually supervised. Data, including track mean speed and cell coordinates were exported for further analysis.

### **Mathematical analysis**

IMARIS track data in (time, x, y, z) format were processed using Python (version 3.5.2) scientific and data analysis libraries (Pandas, Numpy, Scipy and others from the Anaconda distribution version 2.5.0). Time-interpolation was used (assuming constant speed) to fill gaps in track data arising from various tracking anomalies. Tracks were post-processed and augmented with derived observables given initial 4D data points to produce an extended track dataset. Each data point in this dataset was attributed with both numeric observables and metadata for the *condition*, *stage* and *position*. The **Kullback-Liebler divergences** (KLD) have been reported as a [0,1]-scaled measure of the significance of the differences between displacement distributions before and after

treatment. Values close to 1 indicate that the distributions are very different while values close to 0 indicate that they are not.

A **distinct sites visited** metric was derived by partitioning the position volume on a number of scales  $a_n$ . We counted the number of unique volume elements or “sites” at different scales that were visited by individual tracks.

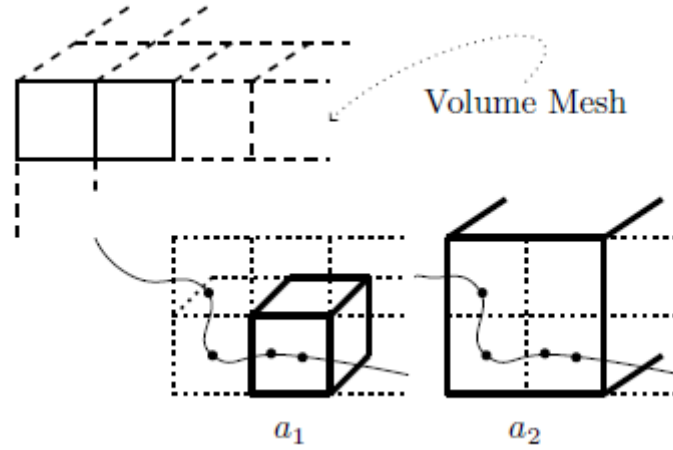

For a given track of length  $n$ , by dividing the distinct number of sites it visits by its length  $n$ , we produce a number between 0 and 1. Unity corresponds to a track visiting a new site (at a particular scale) with each observed jump. We can consider the “scaling behavior” by plotting the number of distinct sites visited as a function of the scale parameter. This method is similar to “box counting” when measuring the fractal dimension of a curve in space. We compared distinct site visited values at the coarse and fine-grained scale. Two-way ANOVA  $P$ -values indicated statistically significant differences within conditions and between stages for T-ALL conditions allowing us to contrast how the volume was explored.

We studied the **ensemble time-averaged mean squared displacement** as a function of lag for each condition. This is defined as the average over all time lags, over all displacements within an experiment set;

$$\Delta^2(\tau) = \frac{1}{M} \sum_{t=1}^{T_j-\tau} \|\mathbf{p}(t+\tau) - \mathbf{p}(t)\|^2$$

Mean squared displacement provides statistical tests relating to particle movement. In particular it provides a test for deviations from “random” linear diffusion. We observed subdiffusive behaviour in most cases with the exception of post-chemotherapy T-ALL post-AMD3100, which showed a transition to superdiffusive.

### Statistical analysis

Data was processed using GraphPad Prism (GraphPad Software Inc.) and Python. Group means were compared using the unpaired Student’s  $t$ -test. For multiple comparisons, ANOVA with post-hoc Bonferroni or Tukey test was used. Differences were considered significant (\*) whenever  $P < 0.05$ ; (\*\*) is used for  $P < 0.01$ , (\*\*\*) for  $P < 0.001$  and (\*\*\*\*) for  $P < 0.0001$



## REFERENCES

1. Xu Y, Yuan L, Mak J, et al. Neuropilin-2 mediates VEGF-C-induced lymphatic sprouting together with VEGFR3. *J Cell Biol* 2010; **188**: 115-130.
2. Kirstetter P, Anderson K, Porse BT, Jacobsen SE, Nerlov C. Activation of the canonical Wnt pathway leads to loss of hematopoietic stem cell repopulation and multilineage differentiation block. *Nat Immunol* 2006; **7**: 1048-1056.
3. Hawkins ED, Oliaro J, Ramsbottom KM, et al. Lethal giant larvae 1 tumour suppressor activity is not conserved in models of mammalian T and B cell leukaemia. *PLoS One* 2014; **9**: e87376.
4. Hawkins ED, Duarte D, Akinduro O, et al. T-cell acute leukaemia exhibits dynamic interactions with bone marrow microenvironments. *Nature* 2016; **538**: 518-522.
5. Krivtsov AV, Twomey D, Feng Z, et al. Transformation from committed progenitor to leukaemia stem cell initiated by MLL-AF9. *Nature* 2006; **442**: 818-822.
6. Wunderlich M, Mizukawa B, Chou FS, et al. AML cells are differentially sensitive to chemotherapy treatment in a human xenograft model. *Blood* 2013; **121**: e90-97.
7. Waibel M, Vervoort SJ, Kong IY, et al. Epigenetic targeting of Notch1-driven transcription using the HDACi panobinostat is a potential therapy against T-cell acute lymphoblastic leukemia. *Leukemia* 2017; e-pub ahead of print Sep 15;10.1038/leu.2017.282.
8. Liao Y, Smyth GK, Shi W. featureCounts: an efficient general purpose program for assigning sequence reads to genomic features. *Bioinformatics* 2014; **30**: 923-930.
9. Law CW, Chen Y, Shi W, Smyth GK. voom: Precision weights unlock linear model analysis tools for RNA-seq read counts. *Genome Biol* 2014; **15**: R29.
10. Subramanian A, Tamayo P, Mootha VK, et al. Gene set enrichment analysis: a knowledge-based approach for interpreting genome-wide expression profiles. *Proc Natl Acad Sci U S A* 2005; **102**: 15545-15550.
11. Liberzon A, Birger C, Thorvaldsdottir H, Ghandi M, Mesirov JP, Tamayo P. The Molecular Signatures Database (MSigDB) hallmark gene set collection. *Cell Syst* 2015; **1**: 417-425.
